# Supplementary material
Source: MDPI journal article supplement (https://www.mdpi.com/2218-1997/9/3/143)
Supplement: s1 [file s1]

## Supporting Information for the Article *The Dynamics of Earth's Cusp in Response to the Interplanetary Shock*

### Contents of this file

Figure S1, Figure S2, Figure S3

### Introduction

This supplementary material contains (a) the CODIF time-of-flight spectra from Cluster C4 during the time interval from 22:30-24:00 UT using the level 0 data, which provide more details for interested readers on the data quality of different ion species; (b) the IMF Bz, auroral electrojet indices, energetic electrons from GOES13 and energy O<sup>+</sup> from Van Allen Probe A, which provide the information of substorm injection onset.

- 1) Figure S1. We plot the CODIF time-of-flight (TOF) spectra for all energies as function of TOF channel and energy (or energy step) during different time intervals. The TOF spectra in panel a and c shows that H<sup>+</sup>, He<sup>+</sup> and O<sup>+</sup> during the time intervals of 22:30-23:00 UT and 23:30-24:00 UT can be well distinguished from each other. The energy of O<sup>+</sup> is around 100 eV. The TOF spectra in panel b indicates that there are O<sup>+</sup> measurements in almost all energies but their counts are very low, which will be further analyzed in Figure S2. It should be noted that the He<sup>++</sup> data product for CODIF is not valid because most of what is binned as He<sup>++</sup> is just a tail on the proton distribution.
- 2) Figure S2. We plot the TOF spectra as function of TOF channel and normalized pulse-height counts in different energy step ranges during 23:00-23:30 UT. The spectrum in panel a and b show that there is a clear O<sup>+</sup> peak in the energy range of 21-40 keV and 10-21 keV, respectively. It is difficult to see a clear O<sup>+</sup> peak in the energy range of 6-10 keV as shown in panel c. In panel d, there is an enhancement in the O<sup>+</sup> range with some randomly distributed counts across all TOF channels. A technique to subtract the H<sup>+</sup> “spill” from the CODIF measurements has been developed for the He<sup>+</sup> data product (Mouikis et al. 2014), but there is no one for O<sup>+</sup> data product. So it is difficult to distinguish O<sup>+</sup> from H<sup>+</sup> below 10 keV, but there are true O<sup>+</sup> signatures above 10 keV.
- 3) Figure S3. We plot the IMF Bz, auroral electrojet indices (SMU and SML) and energetic particles in the dusk sector of the inner magnetosphere including energetic electrons from GOES13 and energetic O<sup>+</sup> from Van Allen Probe A. After the IP shock arrival, the SML index was suddenly decreased and there appears the enhancement of energetic electrons and O<sup>+</sup> due to the substorm injection.

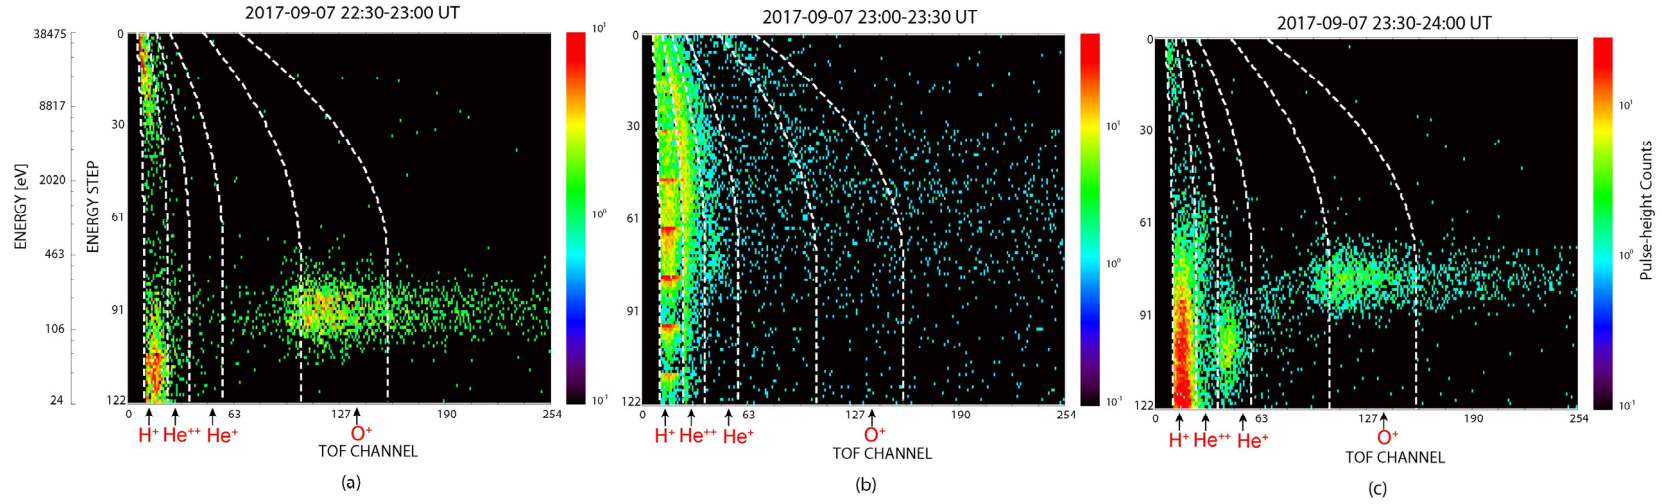

Figure S1. CODIF time-of-flight (TOF) spectra for all energies as function of TOF channel and energy (or energy step) during the time intervals of (a) 22:30-23:00 UT, (b) 23:00-23:30 UT, (c) 23:30-24:00 UT on 7 September 2017. The white dashed lines indicate the TOF windows for the four species,  $H^+$ ,  $He^{++}$ ,  $He^+$  and  $O^+$ .

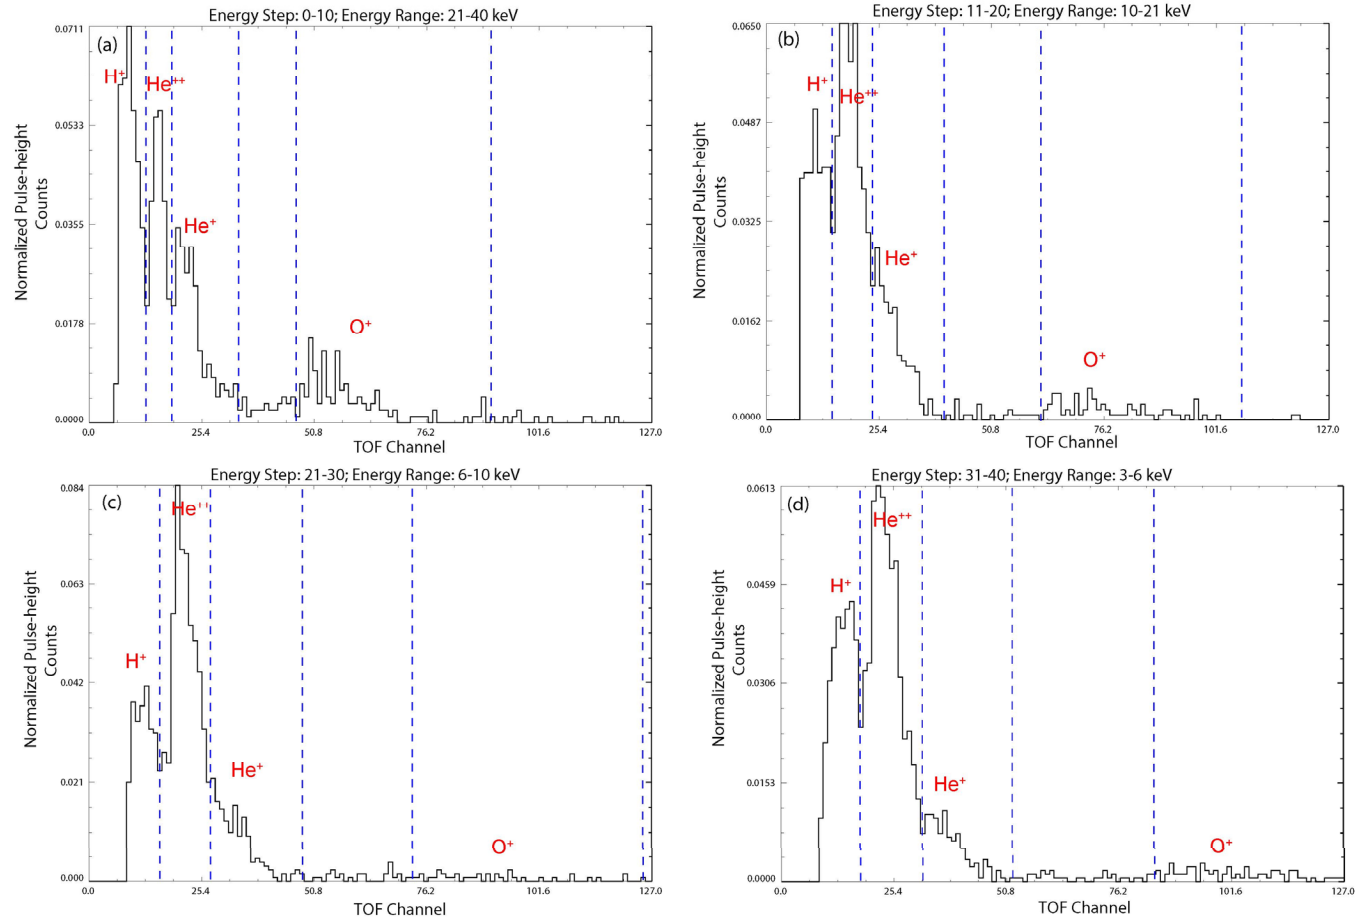

Figure S2. Time-of-flight spectra as function of TOF channel and normalized pulse-height counts in the energy step ranges of (a) 0-10; (b) 11-20; (c) 21-30; (d) 31-40 during 23:00-23:30 UT. The vertical dashed lines show the TOF windows for  $H^+$ ,  $He^{++}$ ,  $He^+$  and  $O^+$ .

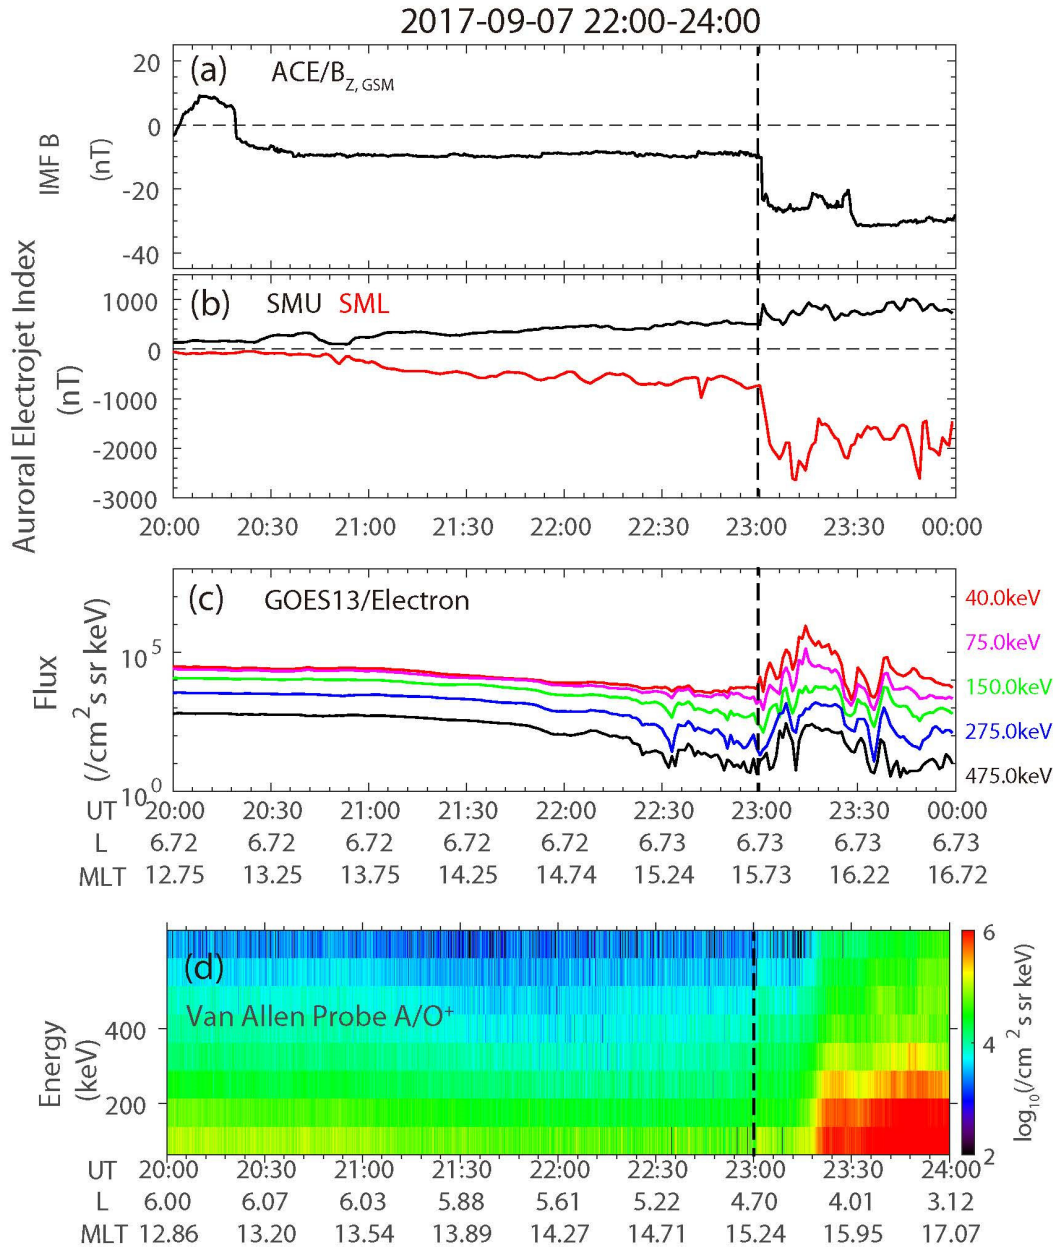

Figure S3. (a) IMF  $B_z$  observed by ACE; (b) Auroral electrojet indices (SMU and SML); (c) Differential flux of energetic electrons observed by GOES13; (d)  $\text{O}^+$  spectrum from the RBSPICE instrument onboard Van Allen Probe A. The vertical dashed line represents the shock arrival time (23:00 UT).
