# Supplementary material
Source: MDPI journal article supplement (https://www.mdpi.com/2218-1997/9/3/143)
Supplement: s1 [file s1]

Archive with 1 entries (1 files):
- universe-2272513-supplementary.pdf
